# Supplementary material for: Efficient interlayer confined nitrate reduction reaction and oxygen generation enabled by interlayer expansion
Source: Royal Society of Chemistry journal article supplement (doi:10.1039/d2nr05001c), 2022-11-25
Supplement: d2nr05001c1.pdf [file d2nr05001c1.pdf]

## **Efficient Interlayer Confined Nitrate Reduction Reaction and Oxygen Generation Enabled by Interlayer Expansion**

Ye Zhang,<sup>a,†</sup> Mengqiu Xu,<sup>a,†</sup> Xudong Xu,<sup>a</sup> Xiaoyu Li,<sup>a</sup> Genping Zhu,<sup>\*a</sup> Gan Jia,<sup>a</sup> Bingchuan Yang,<sup>\*b,c</sup> Ruilian Yin,<sup>d</sup> Peng Gao,<sup>a</sup> and Wei Ye<sup>\*a</sup>

<sup>a</sup> College of Material, Chemistry and Chemical Engineering, Key Laboratory of Organosilicon Chemistry and Material Technology, Ministry of Education, Hangzhou Normal University, Hangzhou, Zhejiang 311121, China.

E-mail: [yewei@hznu.edu.cn](mailto:yewei@hznu.edu.cn); [zhugenping@hznu.edu.cn](mailto:zhugenping@hznu.edu.cn)

<sup>b</sup> School of Chemistry and Chemical Engineering, Liaocheng University, Liaocheng 252000, Shandong, China.

E-mail: [yangbingchuan@lcu.edu.cn](mailto:yangbingchuan@lcu.edu.cn)

<sup>c</sup> School of Chemistry and Chemical Engineering, Shandong University, Jinan, 250100, China.

<sup>d</sup> College of Chemical Engineering, Zhejiang University of Technology, Hangzhou, Zhejiang 310014, China.

<sup>†</sup>These authors contribute equally.

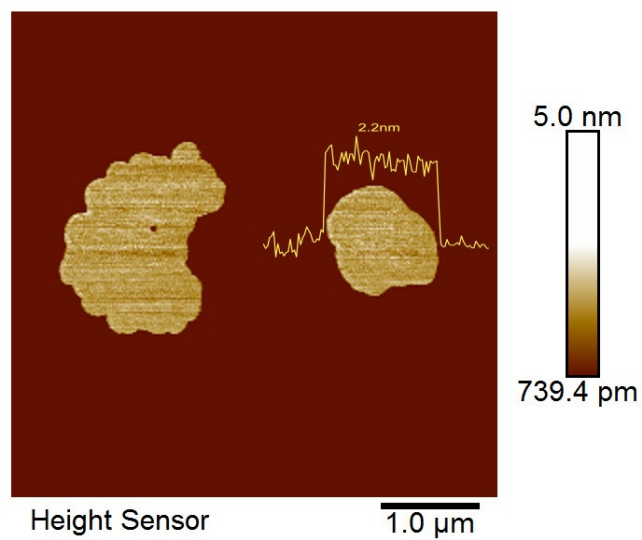

**Fig. S1** AFM image of single  $\alpha\text{-Ni}_{0.881}\text{Fe}_{0.119}(\text{OH})_2$  nanosheet.

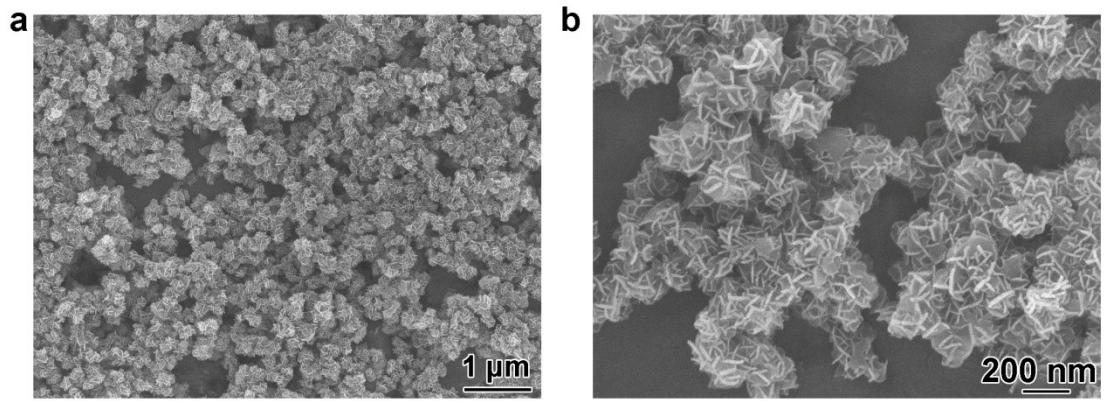

**Fig. S2** (a,b) SEM images of  $\alpha\text{-Ni}_{0.881}\text{Fe}_{0.119}(\text{OH})_2$  nanosheets.

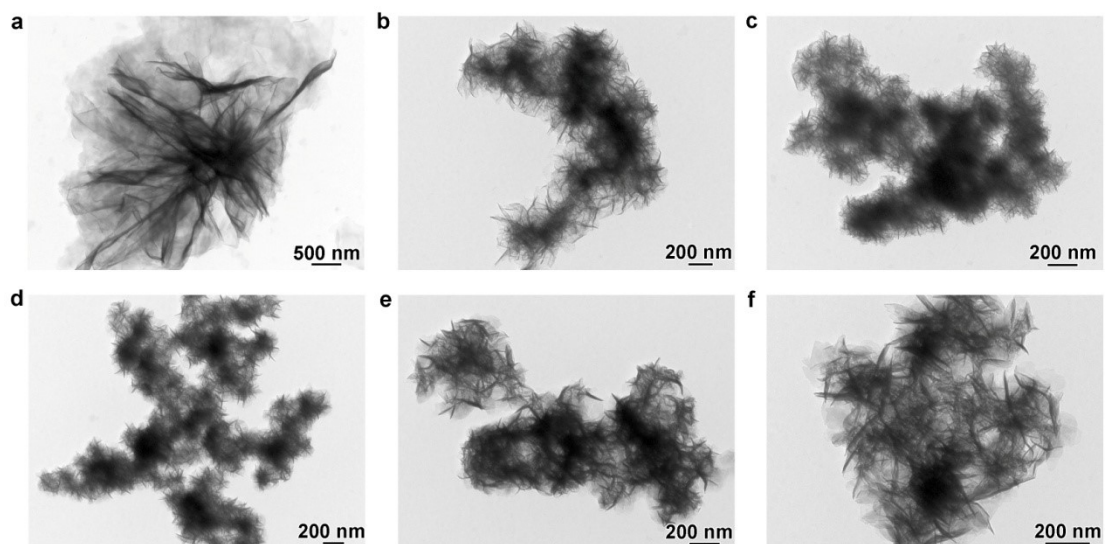

**Fig. S3** TEM images of  $\alpha\text{-Ni}_{1-x}\text{Fe}_x(\text{OH})_2$  nanosheets with different Fe doping levels: (a)  $x=0$ , (b)  $x=0.053$ , (c)  $x=0.098$ , (d)  $x=0.119$ , (e)  $x=0.150$ , (f)  $x=0.171$ .

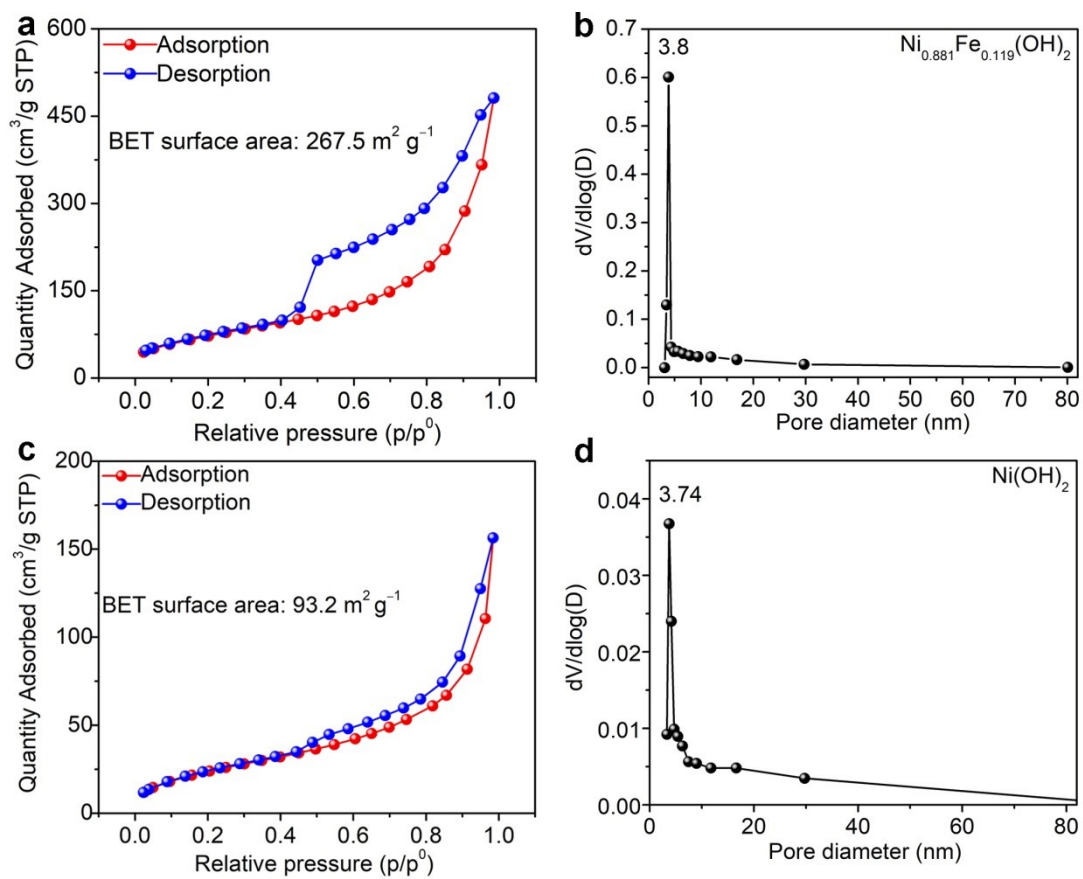

**Fig. S4** Nitrogen adsorption-desorption curves and pore size distributions curves of (a,b)  $\alpha\text{-Ni}_{0.881}\text{Fe}_{0.119}(\text{OH})_2$  nanosheets and (c,d)  $\alpha\text{-Ni}(\text{OH})_2$  nanosheets.

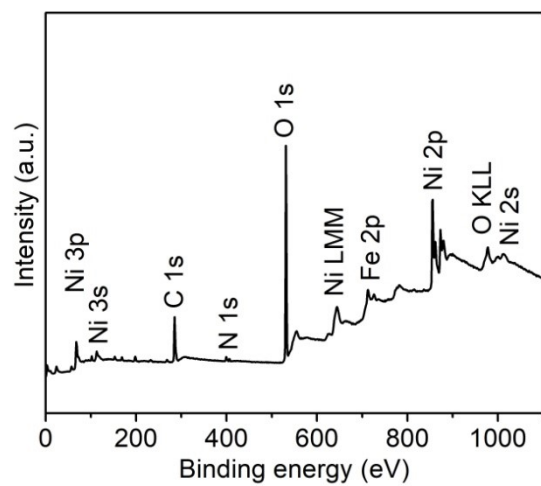

**Fig. S5** XPS survey of  $\alpha$ -Ni<sub>0.881</sub>Fe<sub>0.119</sub>(OH)<sub>2</sub> sample.

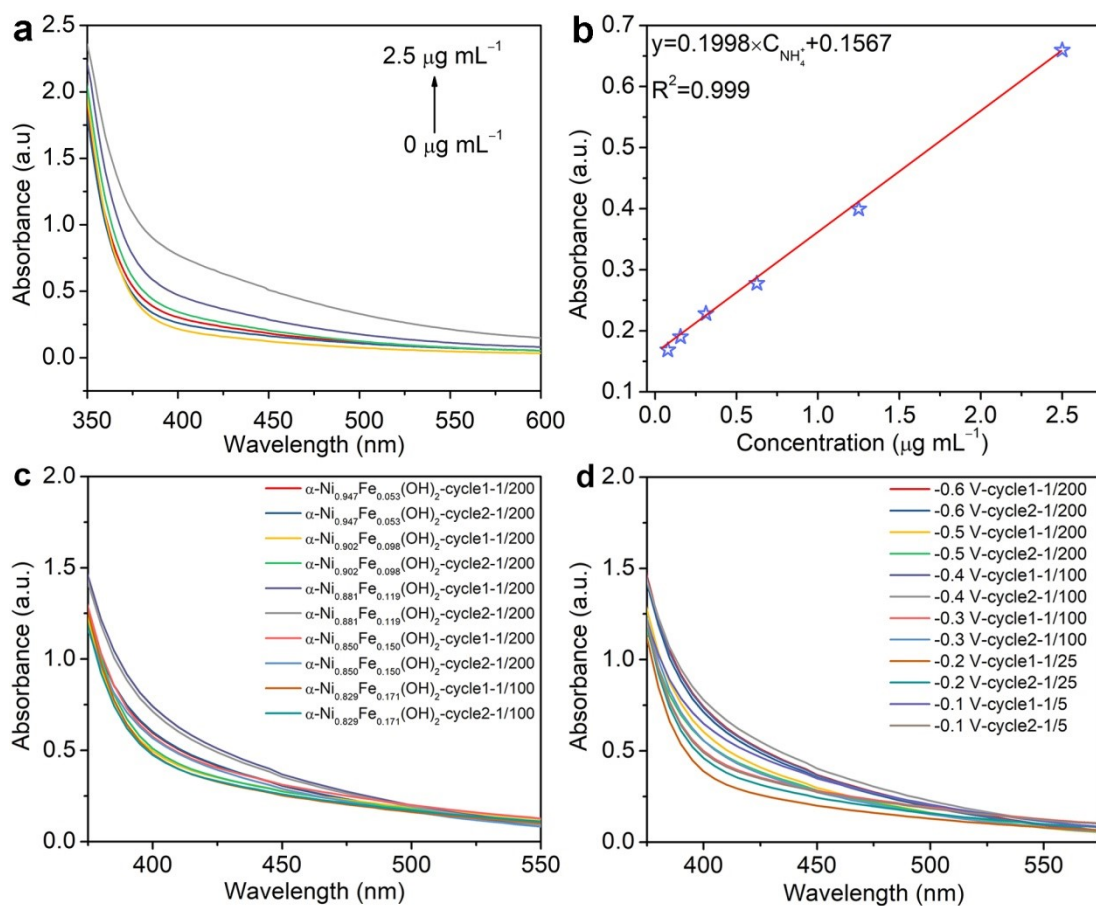

**Fig. S6** (a) UV-vis absorption spectra based on spectrophotometry of Nessler's reagent and (b)  $\text{NH}_3$  concentration-absorbance curve at 420 nm of standard  $\text{NH}_3$  solutions with a series of concentrations. (c) UV-vis absorption spectra for  $\alpha\text{-Ni}_x\text{Fe}_y(\text{OH})_2$  samples acquired at  $-0.6 \text{ V}$ . (d) UV-vis absorption spectra for  $\alpha\text{-Ni}_{0.881}\text{Fe}_{0.119}(\text{OH})_2$  nanosheets acquired at  $-0.6$  to  $-0.1 \text{ V}$ .

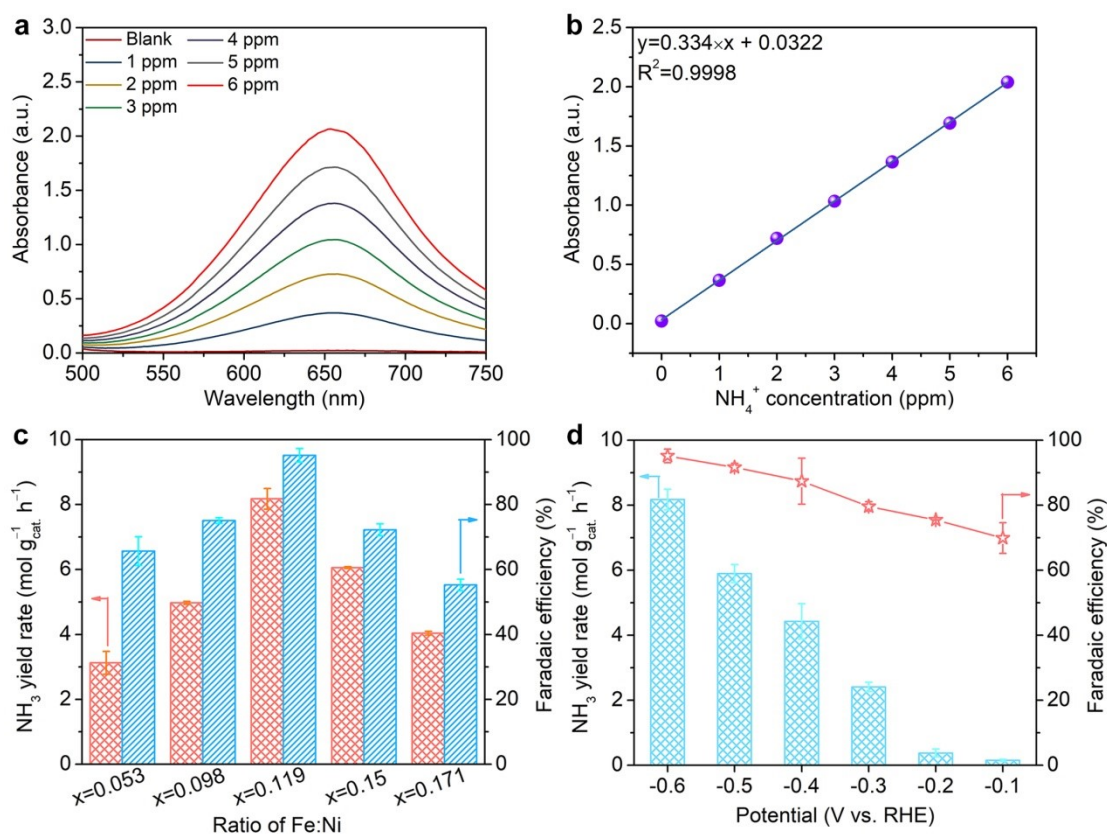

**Fig. S7** (a) UV-vis absorption spectra based on spectrophotometry of indophenol blue method and (b) NH<sub>3</sub> concentration-absorbance curve at 655 nm of standard NH<sub>3</sub> solutions with a series of concentrations. (c) NH<sub>3</sub> yield rates and NO<sub>3</sub><sup>-</sup>-to-NH<sub>3</sub> FEs of  $\alpha$ -Ni<sub>1-x</sub>Fe<sub>x</sub>(OH)<sub>2</sub> nanosheets at -0.6 V. (d) Potential-dependent NH<sub>3</sub> yield rates and FEs of  $\alpha$ -Ni<sub>0.881</sub>Fe<sub>0.119</sub>(OH)<sub>2</sub> nanosheets.



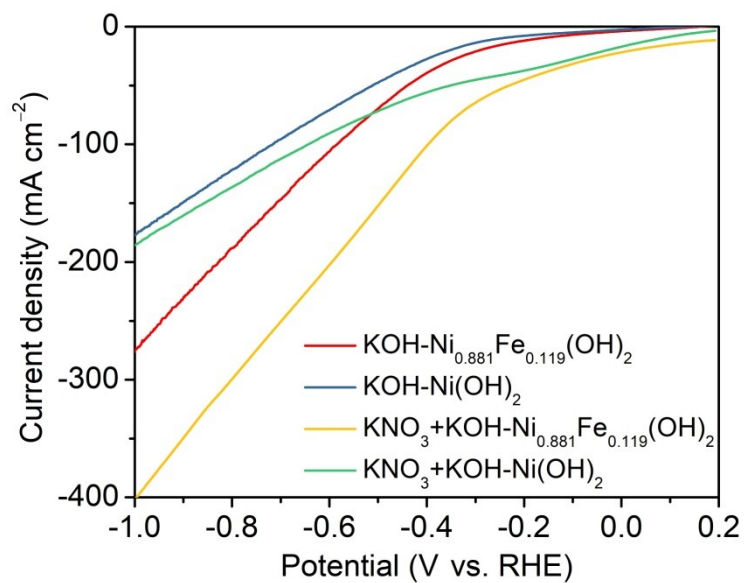

**Fig. S8** The comparison of LSV curves for  $\alpha$ -Ni<sub>0.881</sub>Fe<sub>0.119</sub>(OH)<sub>2</sub> and pristine  $\alpha$ -Ni(OH)<sub>2</sub> nanosheets recorded in KOH or the mixture of KNO<sub>3</sub> + KOH.

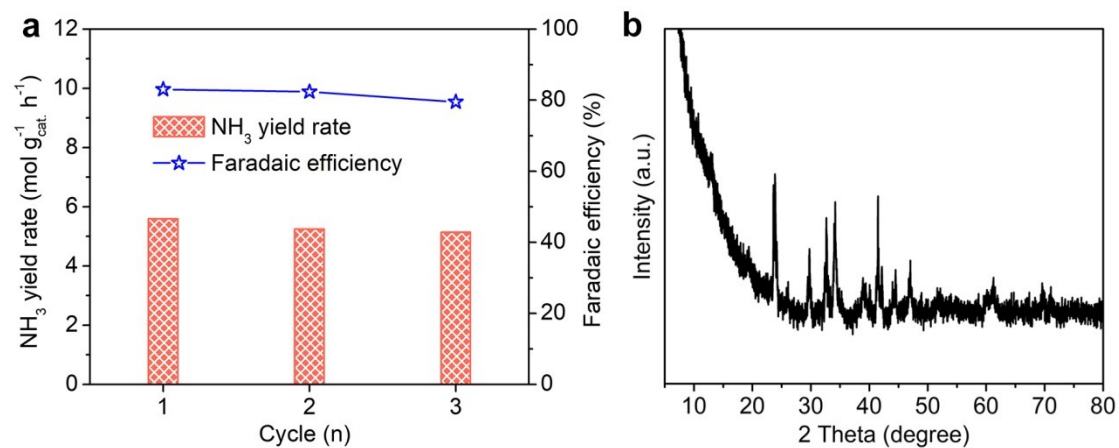

**Fig. S9** (a) NH<sub>3</sub> yield rate and Faradaic efficiency for  $\alpha$ -Ni<sub>0.881</sub>Fe<sub>0.119</sub>(OH)<sub>2</sub> sample recorded at  $-0.7$  V. (b) XRD pattern of  $\alpha$ -Ni<sub>0.881</sub>Fe<sub>0.119</sub>(OH)<sub>2</sub> after electrochemical catalysis at  $-0.7$  V.

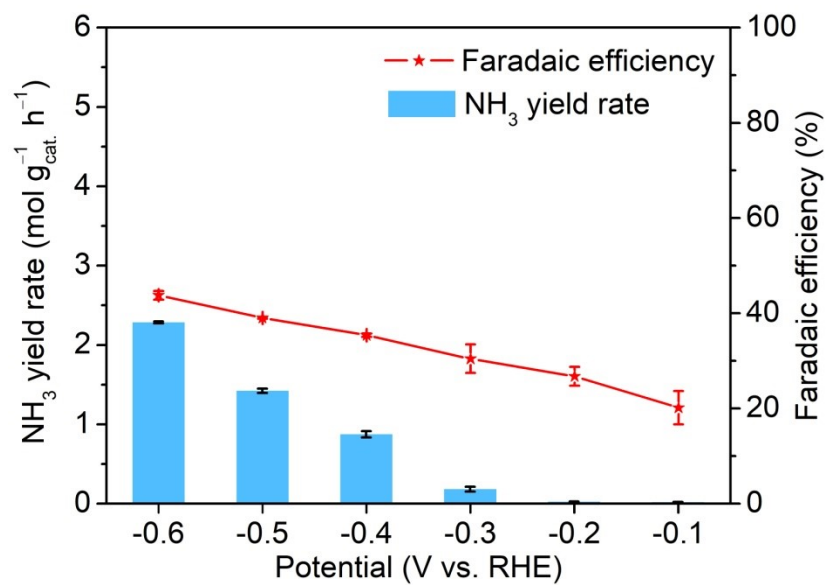

**Fig. S10** Potential-dependent  $\text{NH}_3$  production rates and FEs for  $\alpha\text{-Ni(OH)}_2$  nanosheets.

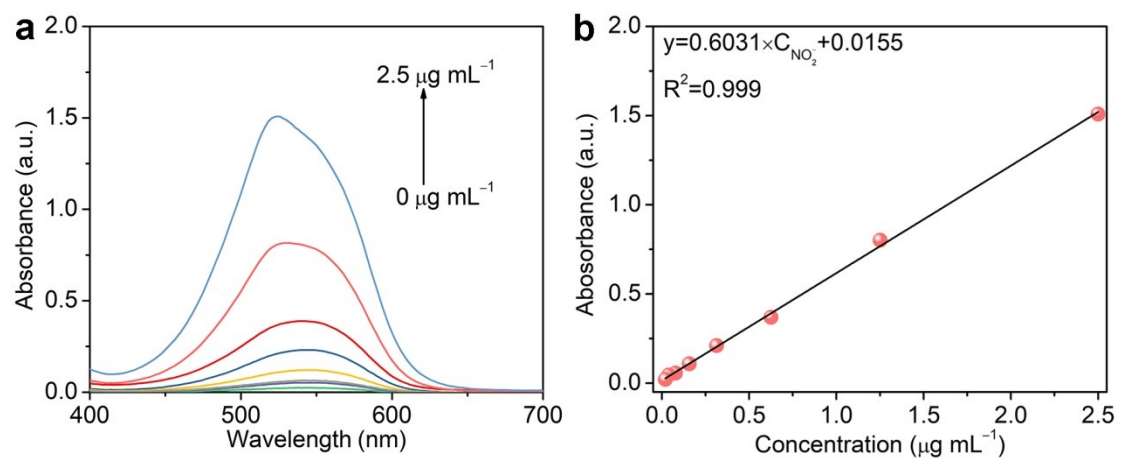

**Fig. S11** (a) UV-vis absorption spectra and (b) concentration-absorbance curve of  $\text{NO}_2^-$  solutions with a series of standard concentrations.

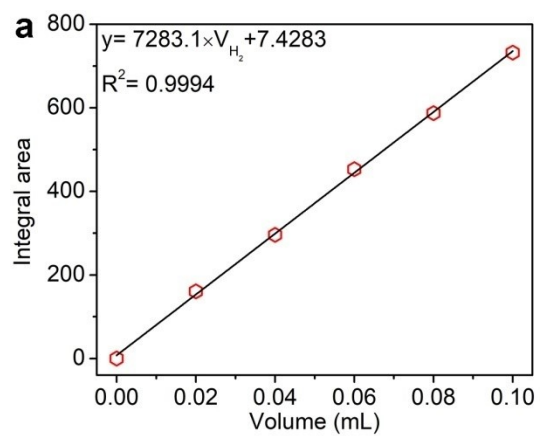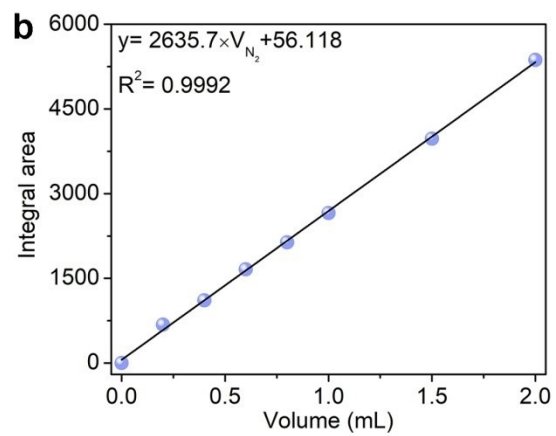

**Fig. S12** Working curves for the determination of produced amount of (a) H<sub>2</sub> and (b) N<sub>2</sub>.

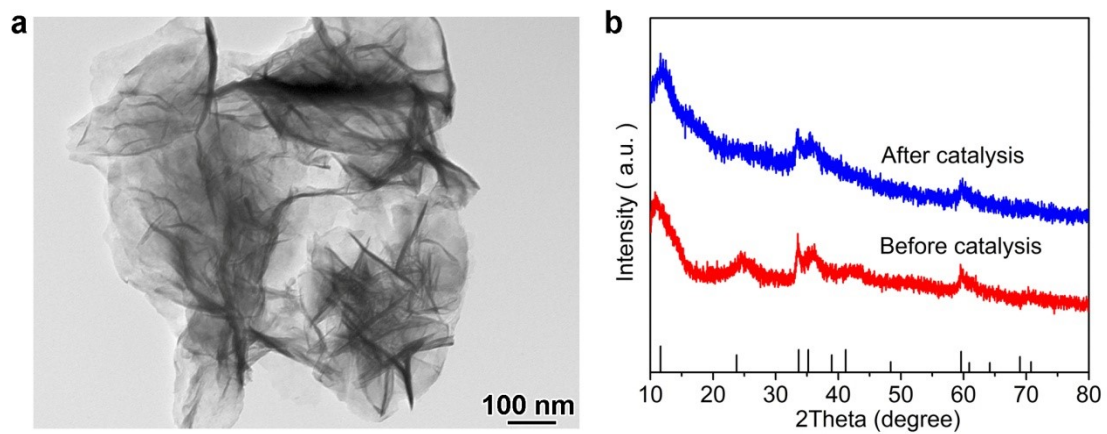

**Fig. S13** (a) TEM image and (b) XRD pattern of  $\alpha\text{-Ni}_{0.881}\text{Fe}_{0.119}(\text{OH})_2$  nanosheets after catalysis.

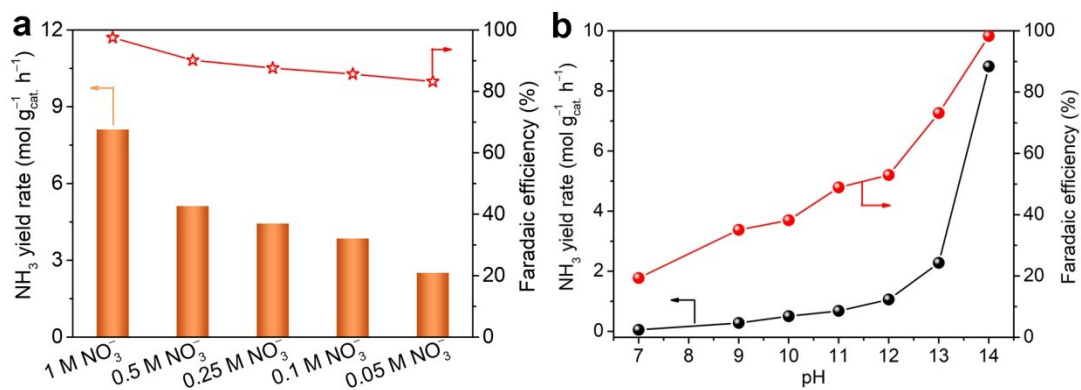

**Fig. S14** (a)  $\text{NH}_3$  yield rates and FEs of  $\alpha\text{-Ni}_{0.881}\text{Fe}_{0.119}(\text{OH})_2$  nanosheets at (a) different concentrations of  $\text{NO}_3^-$  and (b) pH.

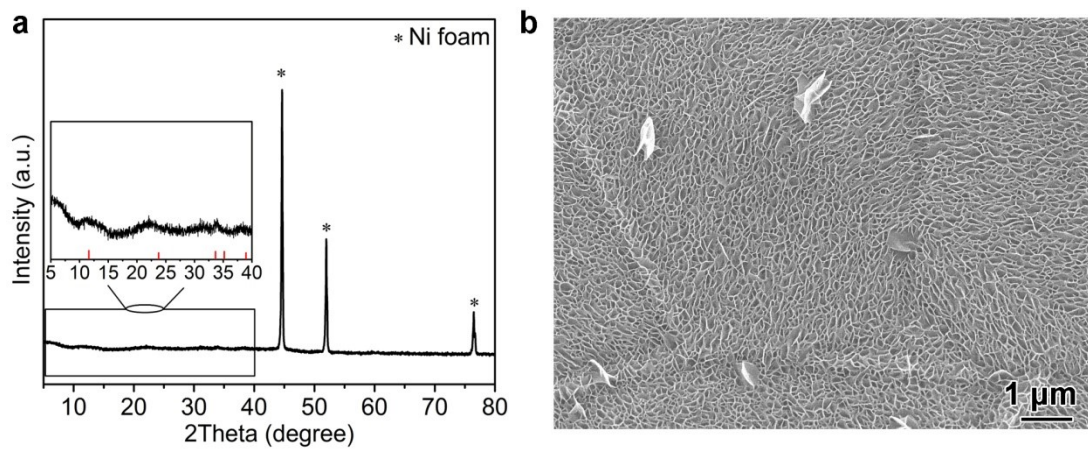

**Fig. S15** (a) XRD pattern and (b) SEM image of  $\alpha\text{-Ni}_{0.881}\text{Fe}_{0.119}(\text{OH})_2$  nanosheets arrays grown on nickel foam.



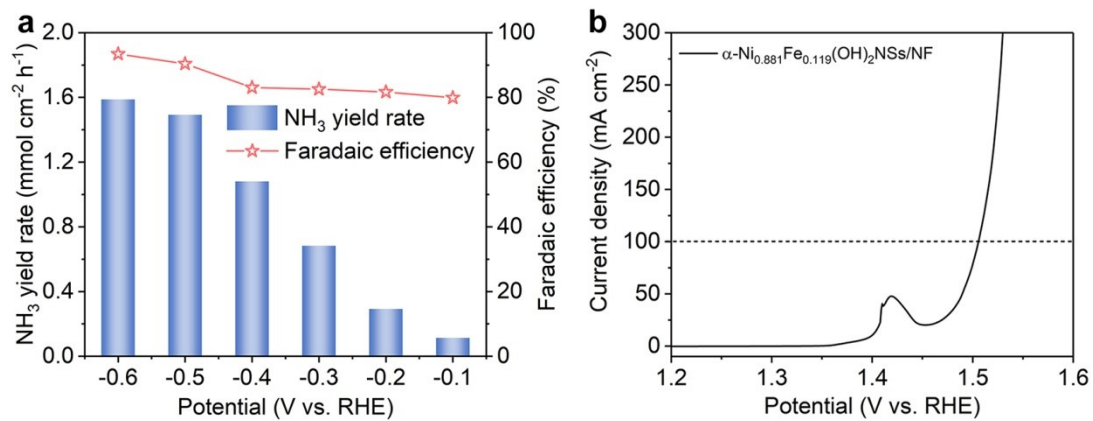

**Fig. S16** (a) the NTRR and (b) OER performance of  $\alpha\text{-Ni}_{0.881}\text{Fe}_{0.119}(\text{OH})_2$  nanosheet arrays on nickel foam.

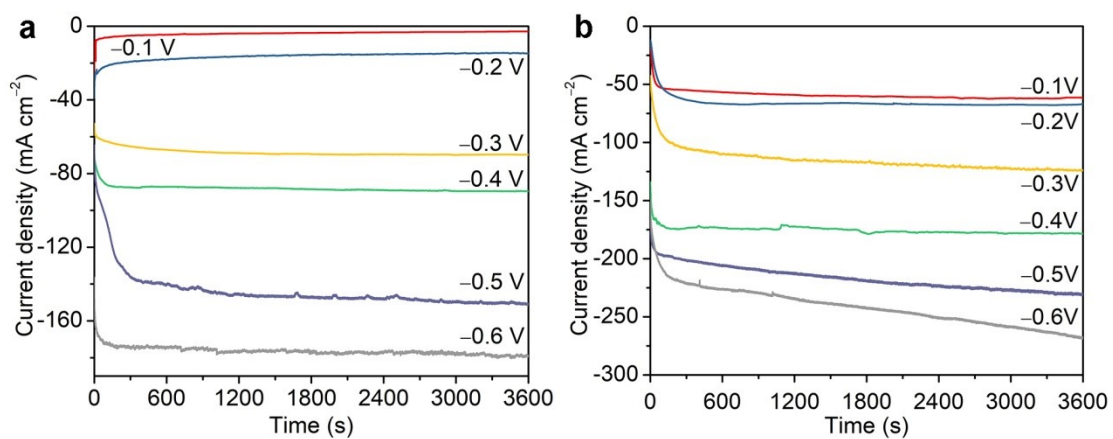

**Fig. S17** *I-t* curves using  $\alpha$ -Ni<sub>0.881</sub>Fe<sub>0.119</sub>(OH)<sub>2</sub> nanosheets as (a) cathodic catalyst and (b) bifunctional catalyst.

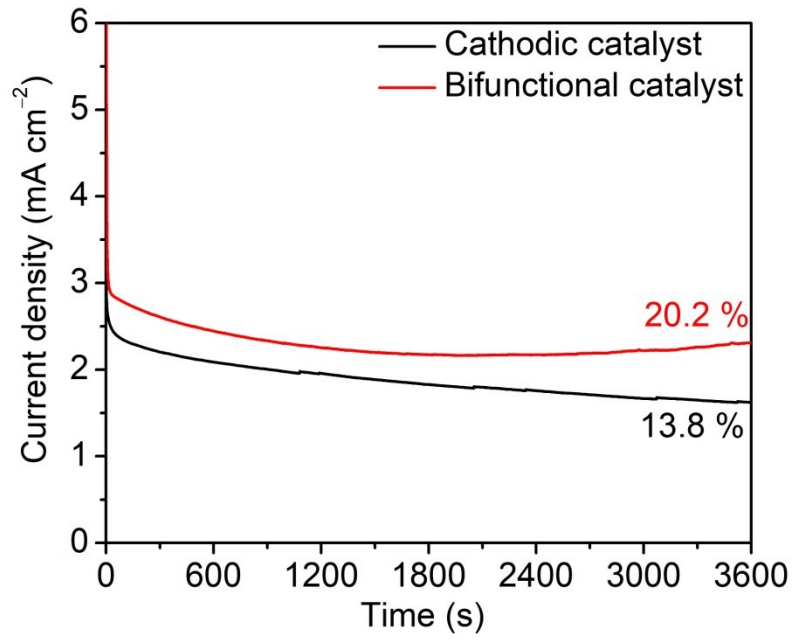

**Fig. S18** *I-t* curves using  $\alpha$ -Ni<sub>0.881</sub>Fe<sub>0.119</sub>(OH)<sub>2</sub> nanosheets as bifunctional catalyst or cathodic catalyst and the corresponding energy efficiencies.

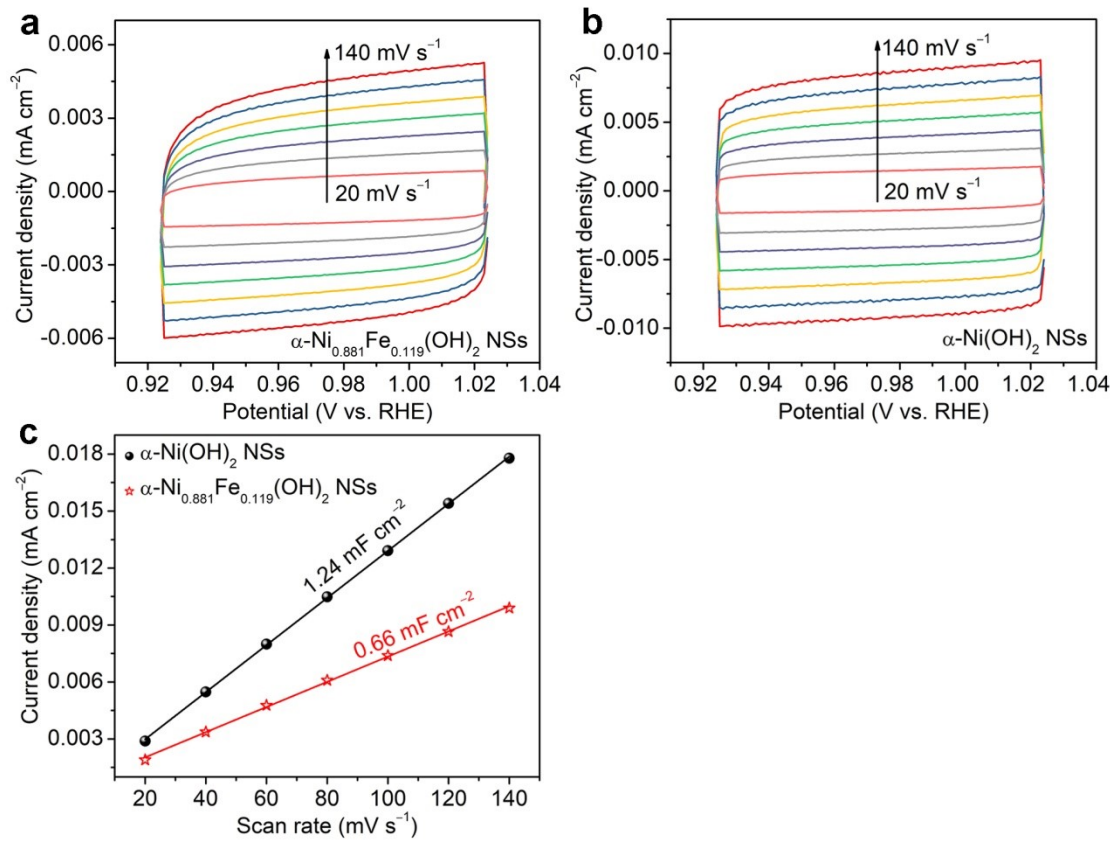

**Fig. 19** Cyclic voltammetry curves recorded at different scan rates (20-140  $\text{mV s}^{-1}$ ): (a)  $\alpha\text{-Ni}_{0.881}\text{Fe}_{0.119}(\text{OH})_2$  nanosheets, (b) pristine  $\alpha\text{-Ni}(\text{OH})_2$  nanosheets. (c) Comparative  $C_{dl}$  for  $\alpha\text{-Ni}_{0.881}\text{Fe}_{0.119}(\text{OH})_2$  nanosheets and  $\alpha\text{-Ni}(\text{OH})_2$  nanosheets derived from CV curves with different scan rates.

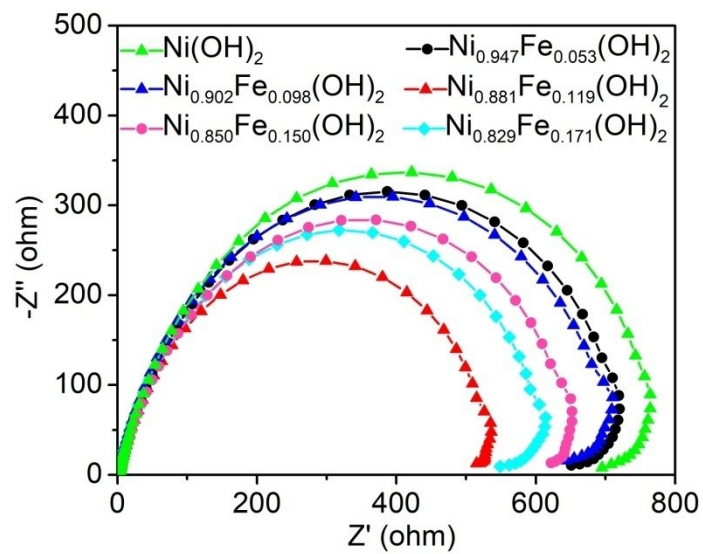

**Fig. S20** EIS Nyquist plots for  $\alpha$ -Ni<sub>1-x</sub>Fe<sub>x</sub>(OH)<sub>2</sub> nanosheets with different Fe doping levels (x=0, 0.053, 0.098, 0.119, 0.150, 0.171).

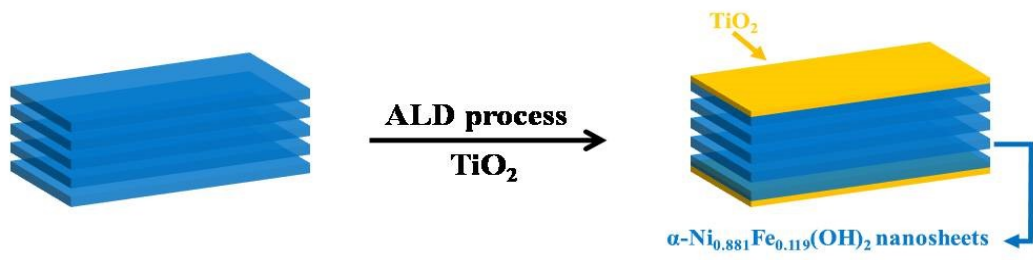

**Fig. S21** Schematic illustration of atomic layer deposition to block the outmost layers of the layered  $\alpha\text{-Ni}_{0.881}\text{Fe}_{0.119}(\text{OH})_2$  nanosheets.

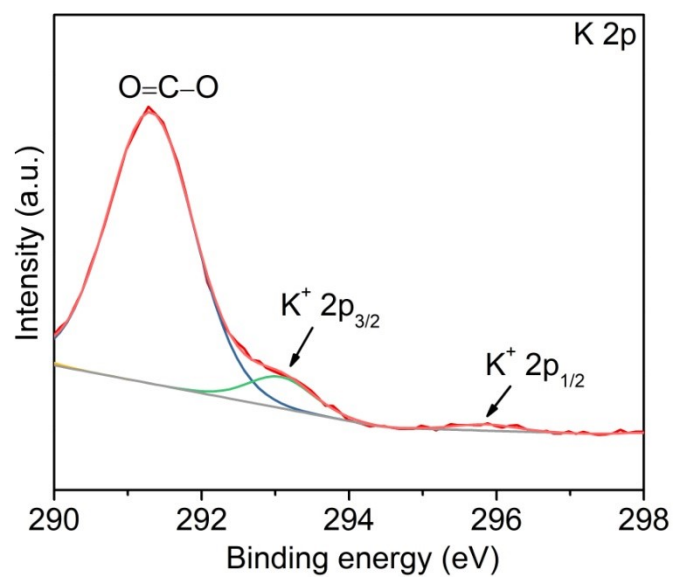

**Fig. S22** K 2p spectrum of  $\alpha$ -Ni<sub>0.881</sub>Fe<sub>0.119</sub>(OH)<sub>2</sub> samples after NTRR test.

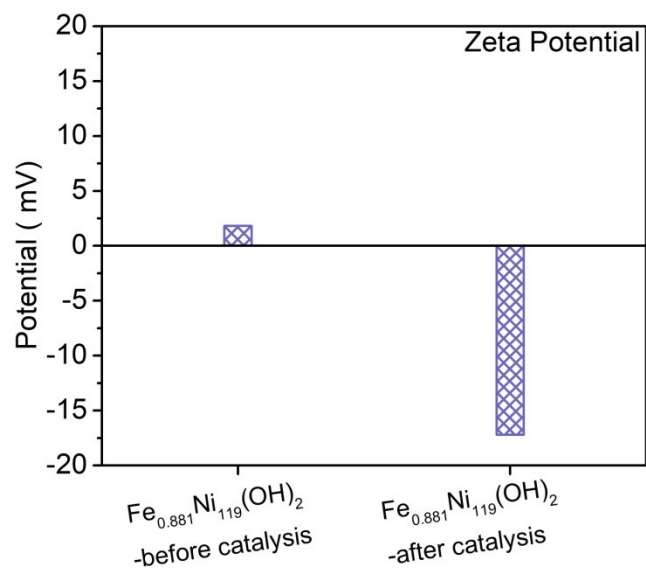

**Fig S23.** Zeta potentials of  $\alpha$ -Ni<sub>0.881</sub>Fe<sub>0.119</sub>(OH)<sub>2</sub> nanosheets before or after catalysis.



**Table S1.** The mole ratios of Ni/Fe in the precursors and the corresponding x in the final  $\alpha$ -Ni<sub>1-x</sub>Fe<sub>x</sub>(OH)<sub>2</sub> samples.

| Ni/Fe ratios | x     |
|--------------|-------|
| 1:0.1        | 0.053 |
| 1:0.2        | 0.098 |
| 1:0.3        | 0.119 |
| 1:0.4        | 0.150 |
| 1:0.5        | 0.171 |
